# Supplementary material for: Mapping the Abundance of Multipurpose Agroforestry Faidherbia albida Trees in Senegal
Source: MDPI journal article supplement (doi:10.3390/rs14030662), 2022-01-29
Supplement: s1 [file s1]

# Supplementary Materials

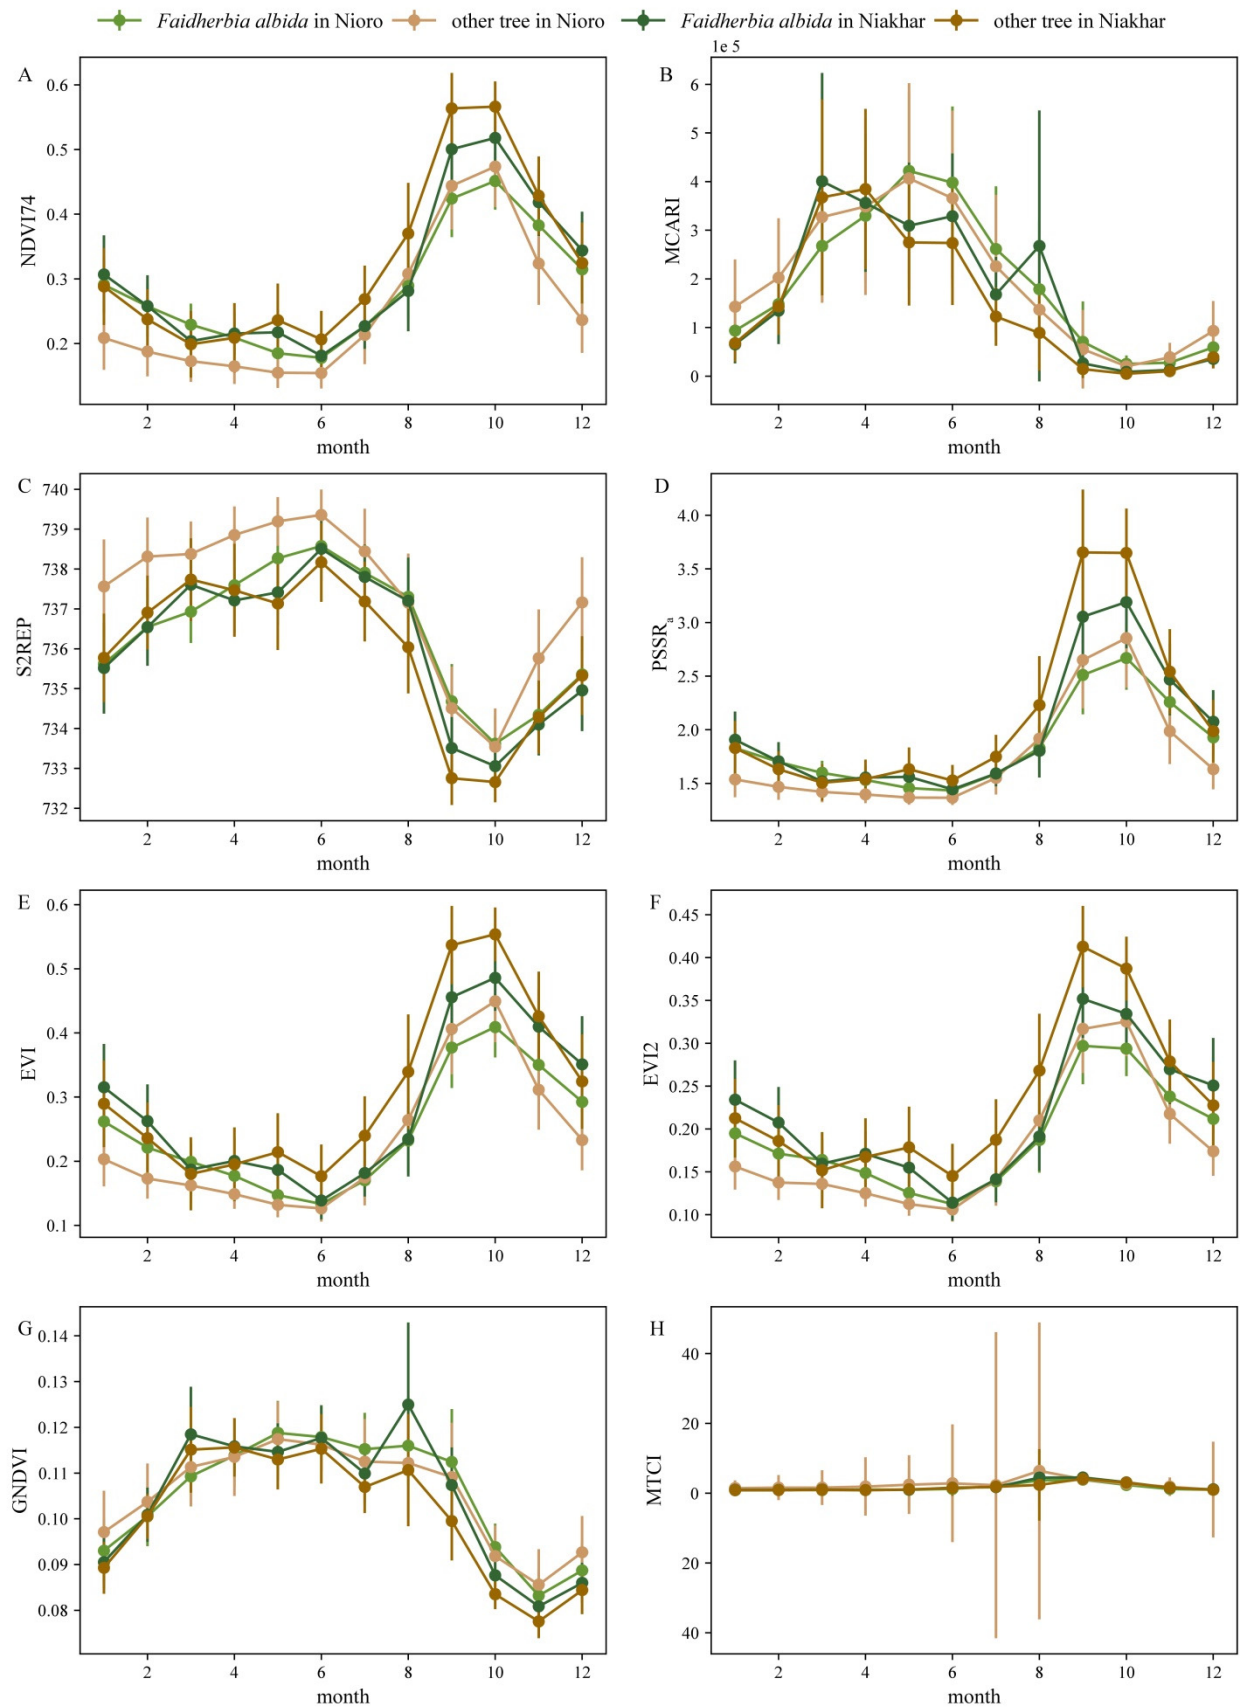

**Figure S1.** Averaged monthly (A) NDVI74, (B) MCARI, (C) S2REP, (D) PSSRa, (E) EVI, (F) EVI2, (G) GNDVI, (H) MTCI values for sample pixels of *Faidherbia albida* and other species in the regions of Nioro and Niakhar. Vertical lines

represent the standard deviation of the sample population. Overall, 1418 pixels were sampled and averaged over the study period, including 57 *Faidherbia albida* pixels and 112 pixels with other tree species in the Nioro region, and 459 *Faidherbia albida* pixels and 790 pixels with other species in the Niakhar region.

**Table S1.** Vegetation indices used in the study. Their formulation and the related spectral bands (band numbering is referring to the Sentinel-2 sensor system).

| Vegetable index | Formulation                                                                  | Bands                                                                           |
|-----------------|------------------------------------------------------------------------------|---------------------------------------------------------------------------------|
| NDVI            | $(\text{NIR}-\text{R})/(\text{NIR}+\text{R})$                                | $(\text{B8}-\text{B4})/(\text{B8}+\text{B4})$                                   |
| DNVI74          | $(\text{NIR}-\text{R})/(\text{NIR}+\text{R})$                                | $(\text{B7}-\text{B4})/(\text{B7}+\text{B4})$                                   |
| MCARI           | $[(\text{RE}-\text{R})-0.2(\text{RE}-\text{G})]*(\text{RE}-\text{R})$        | $[(\text{B5}-\text{B4})-0.2(\text{B5}-\text{B3})]*(\text{B8}+\text{B4})$        |
| PSSRa           | $\text{NIR}/\text{R}$                                                        | $\text{B7}/\text{B4}$                                                           |
| S2REP           | $705+35*(((\text{NIR}+\text{R})/2)-\text{RE1})/(\text{RE2}-\text{RE1}))$     | $705+35*(((\text{B7}+\text{B4})/2)-\text{B5})/(\text{B6}-\text{B5}))$           |
| EVI             | $2.5 * (\text{NIR} - \text{R})/((\text{NIR} + 6*\text{R} - 7.5*\text{B})+1)$ | $2.5* (\text{B8}- \text{B4})/((\text{B8} + 6.0* \text{B4}-7.5* \text{B2}) + 1)$ |
| EVI2            | $2.5 * (\text{NIR} - \text{R}) / ((\text{NIR} + \text{R} + 1)$               | $2.4 * (\text{B8} - \text{B4}) / (\text{B8} + \text{B4} + 1.0)$                 |
| NDI54           | $(\text{NIR}-\text{R})/(\text{NIR}+\text{R})$                                | $(\text{B5}-\text{B4})/(\text{B5}+\text{B4})$                                   |
| GNDVI           | $(\text{NIR}-\text{G})/(\text{NIR}+\text{G})$                                | $(\text{B7}-\text{B3})/(\text{B7}+\text{B3})$                                   |
| MTCI            | $(\text{NIR}-\text{RE})/(\text{RE}-\text{R})$                                | $(\text{B6}-\text{B5})/(\text{B5}-\text{B4})$                                   |

**Table S2.** Correlation coefficient of monthly vegetation index of *Faidherbia albida*.

| Correlation coefficient | NDVI  | NDVI74 | MCARI | S2REP | PSSR <sub>a</sub> | EVI   | EVI2  | NDI54 | GNDVI | MTCI  |
|-------------------------|-------|--------|-------|-------|-------------------|-------|-------|-------|-------|-------|
| NDVI                    | \     | 0.99   | 0.91  | 0.98  | 0.98              | 0.97  | 0.99  | 0.76  | -0.66 | 0.43  |
| NDVI74                  | 0.99  | \      | -0.89 | -0.95 | 0.99              | 0.98  | 0.99  | 0.69  | -0.59 | 0.52  |
| MCARI                   | -0.91 | -0.89  | \     | 0.93  | -0.84             | -0.83 | 0.87  | -0.82 | 0.80  | -0.29 |
| S2REP                   | -0.98 | 0.95   | 0.93  | \     | 0.93              | -0.91 | 0.94  | -0.88 | 0.79  | 0.24  |
| PSSR <sub>a</sub>       | 0.98  | 0.99   | -0.84 | -0.93 | \                 | 0.98  | 0.98  | 0.65  | -0.54 | 0.53  |
| EVI                     | 0.97  | 0.98   | -0.83 | -0.91 | 0.98              | \     | 0.99  | 0.60  | -0.47 | 0.59  |
| EVI2                    | 0.99  | 0.99   | -0.87 | -0.94 | 0.98              | 0.99  | \     | 0.67  | -0.55 | 0.53  |
| NDI54                   | 0.76  | 0.69   | -0.82 | -0.88 | 0.65              | 0.60  | 0.67  | \     | -0.97 | -0.23 |
| GNDVI                   | -0.66 | -0.60  | 0.81  | 0.79  | -0.54             | -0.47 | -0.55 | -0.97 | \     | 0.29  |
| MTCI                    | 0.42  | 0.51   | -0.29 | -0.23 | 0.53              | 0.59  | 0.53  | -0.23 | 0.29  | \     |

**Table S3.** Correlation coefficient between vegetation index values of *Faidherbia albida* and other species.

|                         | NDVI | NDVI74 | MCARI | S2REP | PSSR <sub>a</sub> | EVI  | EVI2 | NDI54 | GNDVI | MTCI |
|-------------------------|------|--------|-------|-------|-------------------|------|------|-------|-------|------|
| Correlation coefficient | 0.94 | 0.96   | 0.95  | 0.94  | 0.96              | 0.96 | 0.94 | 0.87  | 0.97  | 0.88 |

**Table S4.** Climatic, geomorphologic, and pedologic layers used for the Species Distribution Modelling[1].

| Type           | Variable Layer                    | Data Source   | Resolution     |
|----------------|-----------------------------------|---------------|----------------|
| Climatic       | Moisture deficit of driest season | BiodiversityR | 30 arc-seconds |
|                | Precipitation of warmest quarter  | WorldClim     | 30 arc-seconds |
|                | Precipitation of coldest quarter  | WorldClim     | 30 arc-seconds |
|                | Precipitation of driest month     | WorldClim     | 30 arc-seconds |
|                | Precipitation seasonality         | WorldClim     | 30 arc-seconds |
|                | Mean diurnal range                | WorldClim     | 30 arc-seconds |
|                | PET wettest quarter               | ENVIREM       | 30 arc-seconds |
|                | PET coldest quarter               | ENVIREM       | 30 arc-seconds |
|                | PET driest quarter                | ENVIREM       | 30 arc-seconds |
| Geomorphologic | Topographic wetness index         | ENVIREM       | 30 arc-seconds |
|                | Topographic roughness index       | ENVIREM       | 30 arc-seconds |
| Pedologic      | Clay content                      | SoilGrid250   | 250m           |
|                | Silt content                      | SoilGrid250   | 250m           |
|                | Bulk content                      | SoilGrid250   | 250m           |

**Tables S5.** Results from the 4-fold cross-validation using a test set of 40 features.

|           | iteration 1 | iteration 2 | iteration 3 | iteration 4 | average |
|-----------|-------------|-------------|-------------|-------------|---------|
| precision | 0.89        | 0.92        | 0.89        | 0.92        | 0.91    |
| recall    | 0.88        | 0.87        | 0.86        | 0.8         | 0.85    |
| F-measure | 0.88        | 0.88        | 0.87        | 0.87        | 0.89    |

## References

1. Kindt, Roeland. A climate change atlas for Africa. Presentation made during a workshop on the estimation of the potential of agroforestry to mitigate climate change in sub-Saharan Africa, organized by CIRAD, Montpellier, France. **2021**. 10.13140/RG.2.2.11028.83841.
